# Supplementary material for: A Low Glycemic Index Mediterranean Diet Combined with Aerobic Physical Activity Rearranges the Gut Microbiota Signature in NAFLD Patients
Source: MDPI journal article supplement (doi:10.3390/nu14091773), 2022-04-23
Supplement: s1 [file s1]

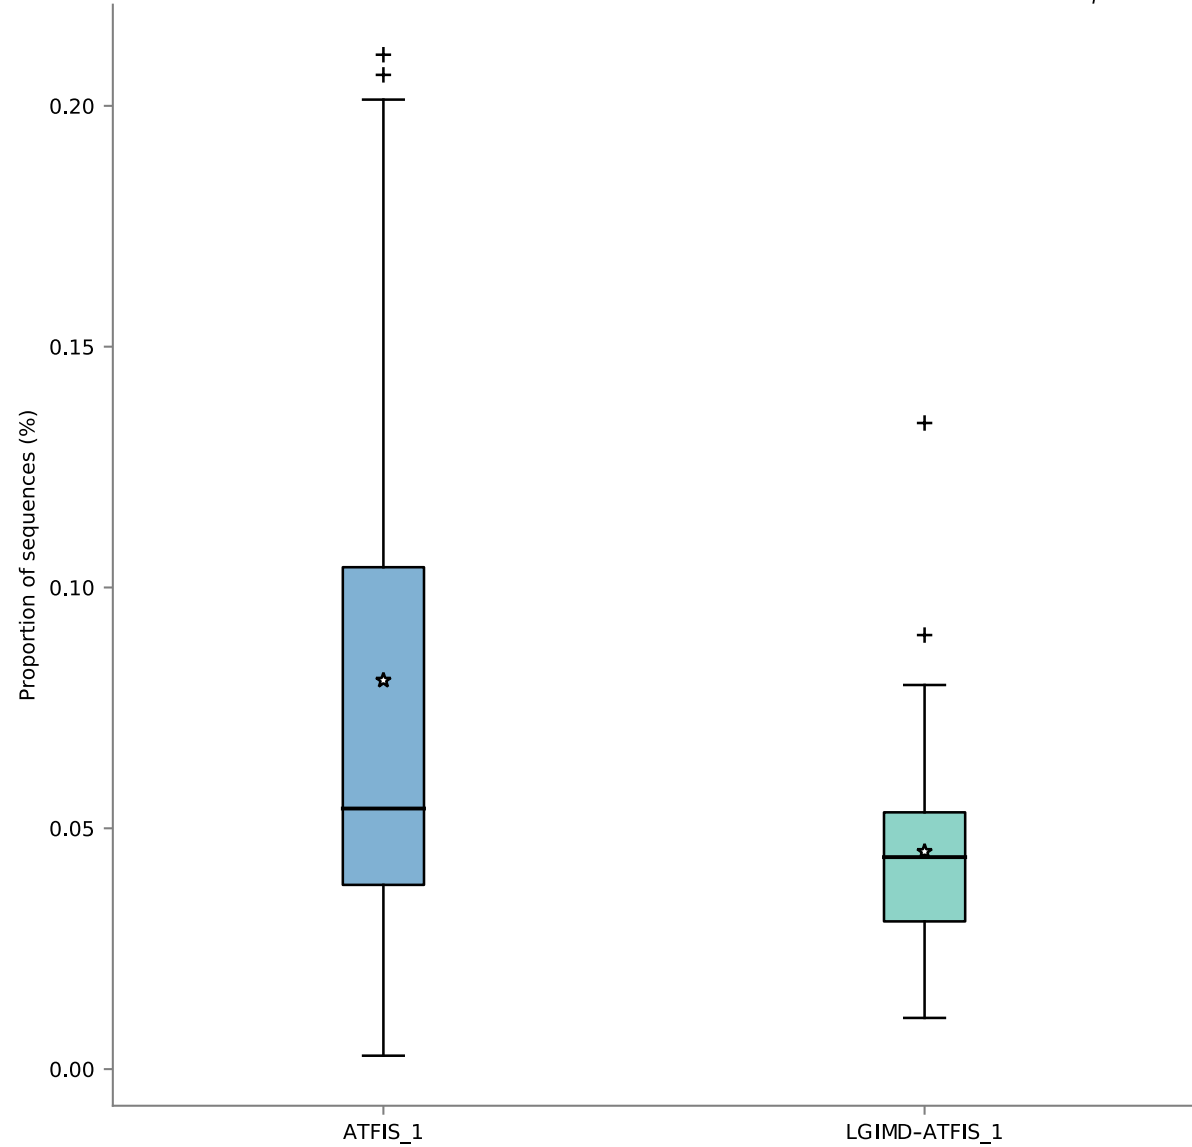

| CMP-legionamate_biosynthesis_I     | values     |
|------------------------------------|------------|
| LGIMD-ATFIS_1: mean rel. freq. (%) | 0.04516236 |
| LGIMD-ATFIS_1: std. dev. (%)       | 0.02327737 |
| ATFIS_1: mean rel. freq. (%)       | 0.08072176 |
| ATFIS_1: std. dev. (%)             | 0.05830324 |
| p-values                           | 0.00025869 |
| p-values (corrected)               | 0.04695201 |
| Difference between means           | -0.0355594 |
| 95.0% lower CI                     | -0.0539378 |
| 95.0% upper CI                     | -0.0171811 |
