# Supplementary material for: A Low Glycemic Index Mediterranean Diet Combined with Aerobic Physical Activity Rearranges the Gut Microbiota Signature in NAFLD Patients
Source: MDPI journal article supplement (doi:10.3390/nu14091773), 2022-04-23

Ruminococcus

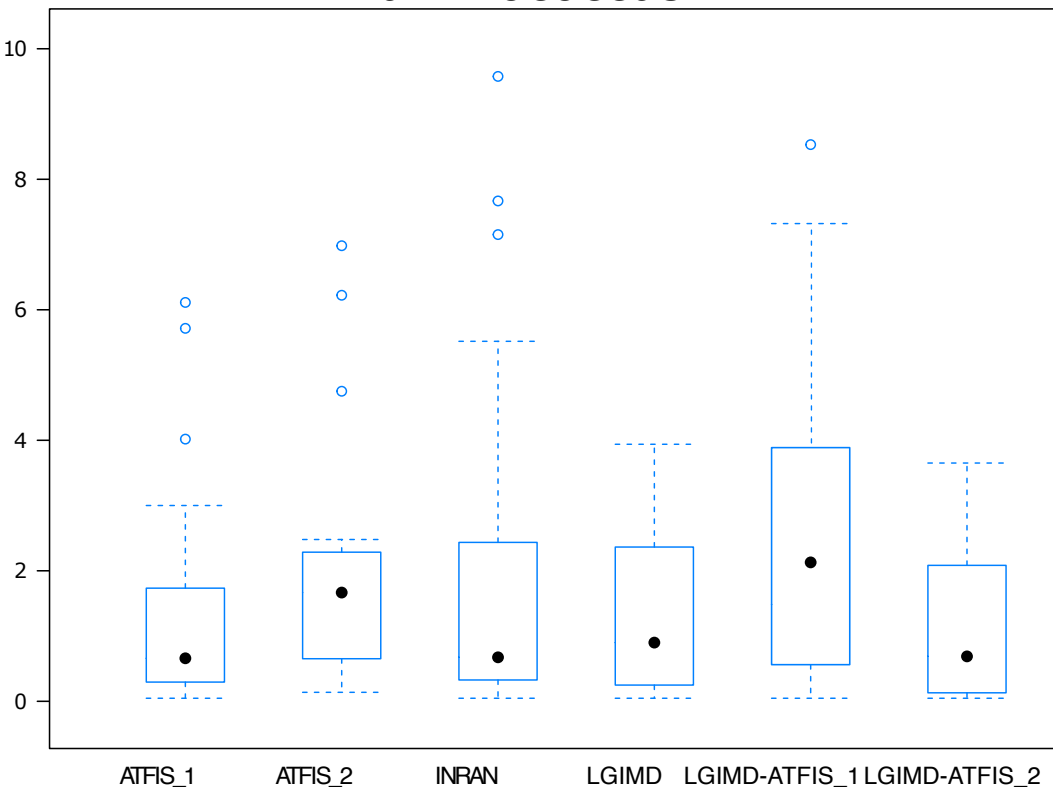

Oscillospiraceae\_UCG005

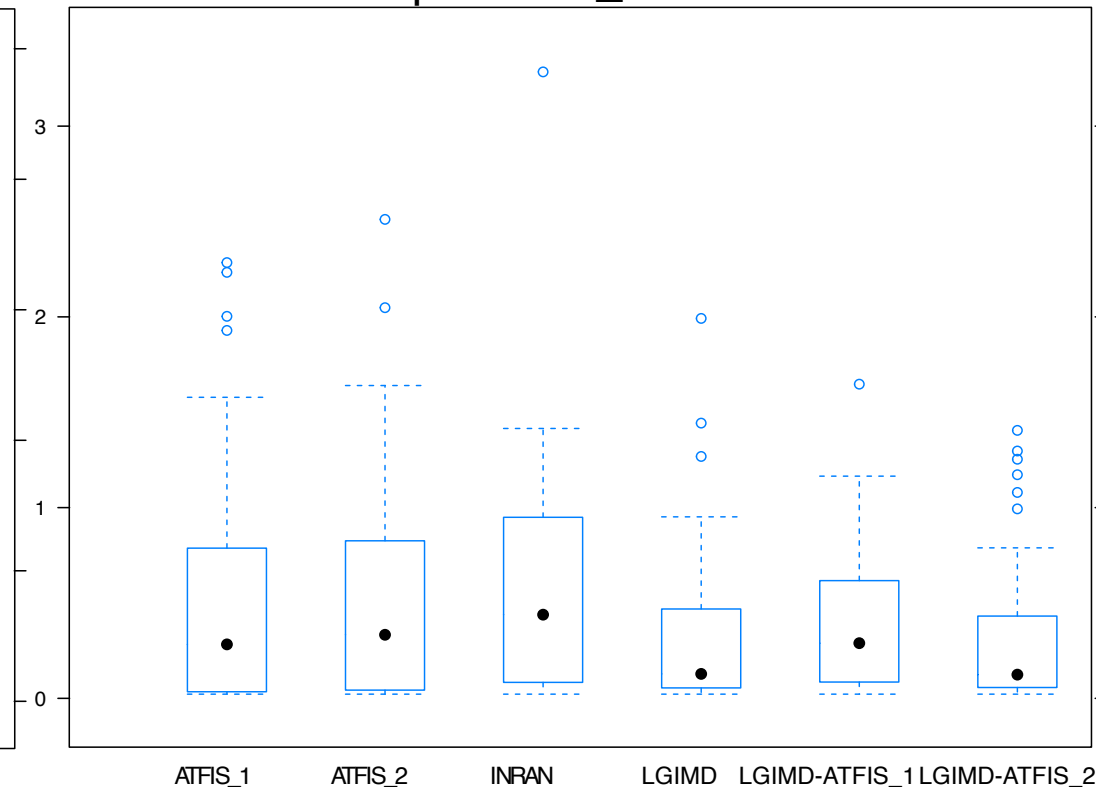

Collinsella

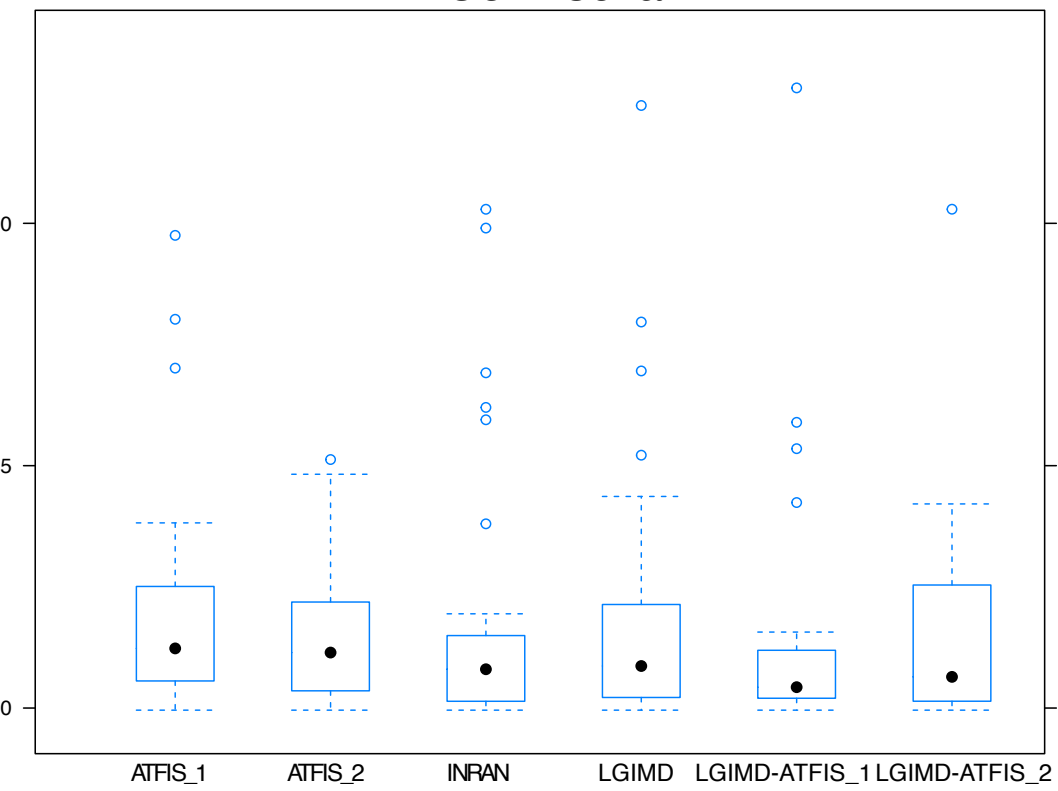

Alistipes

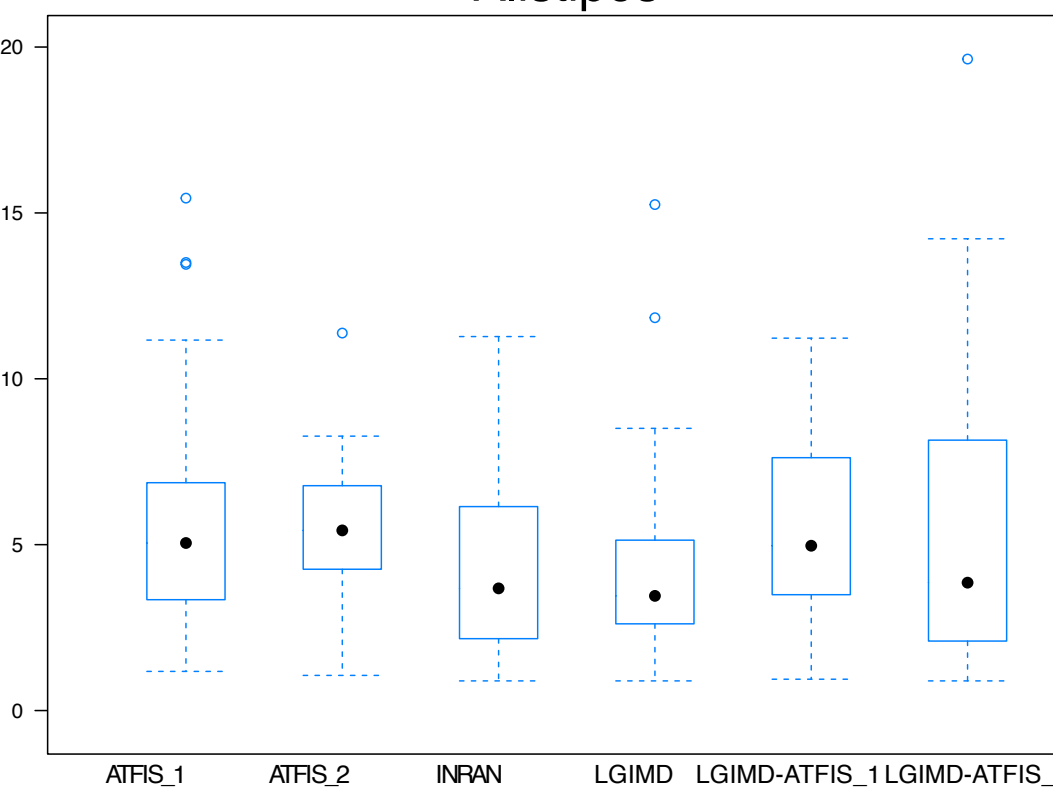

Dialister

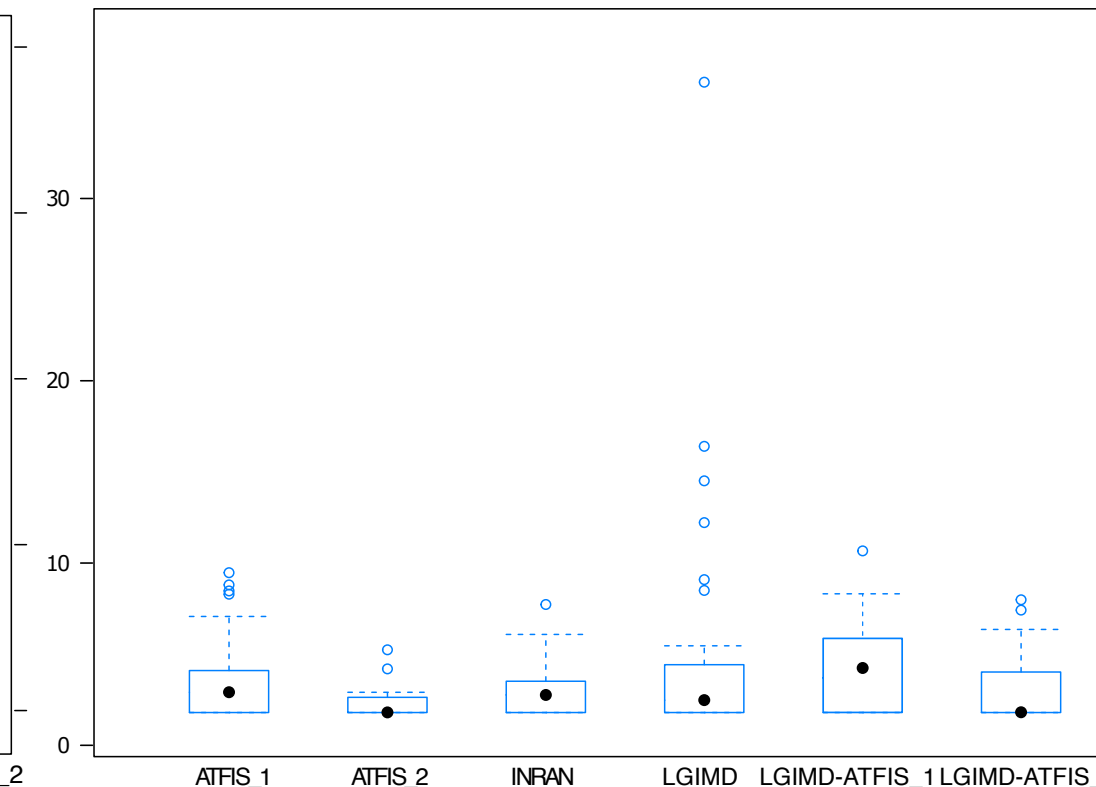

Oscillospiraceae\_g\_UCG002

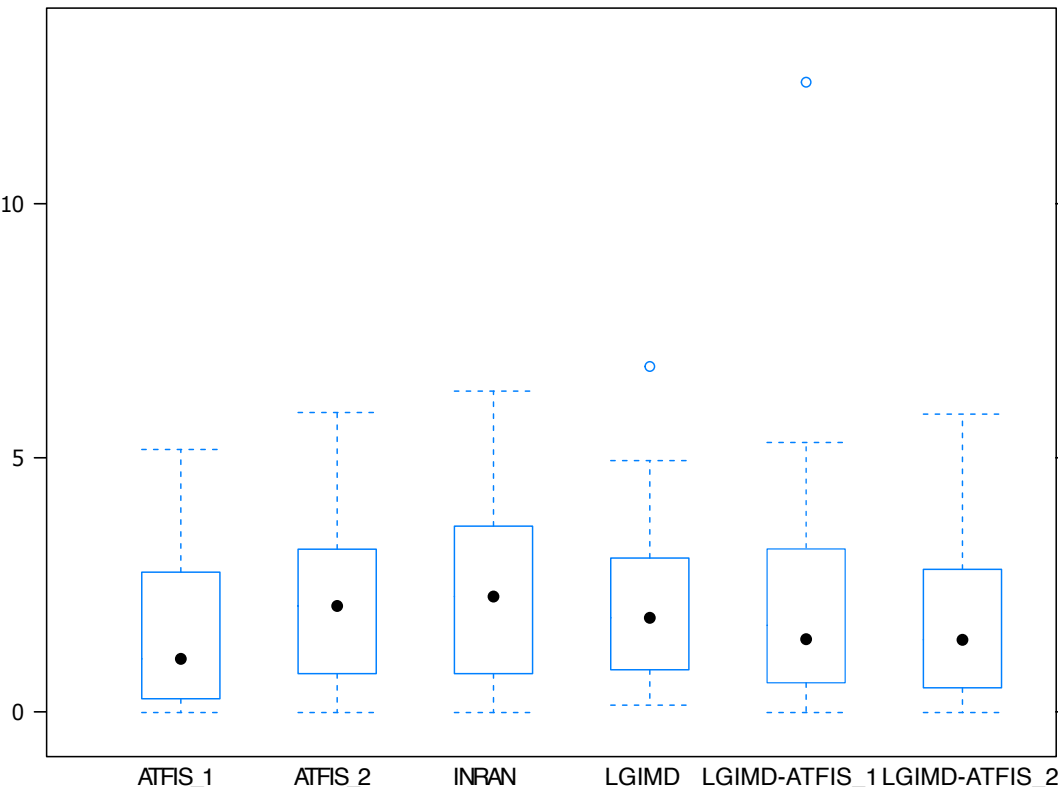

Eubacterium\_eligens\_group

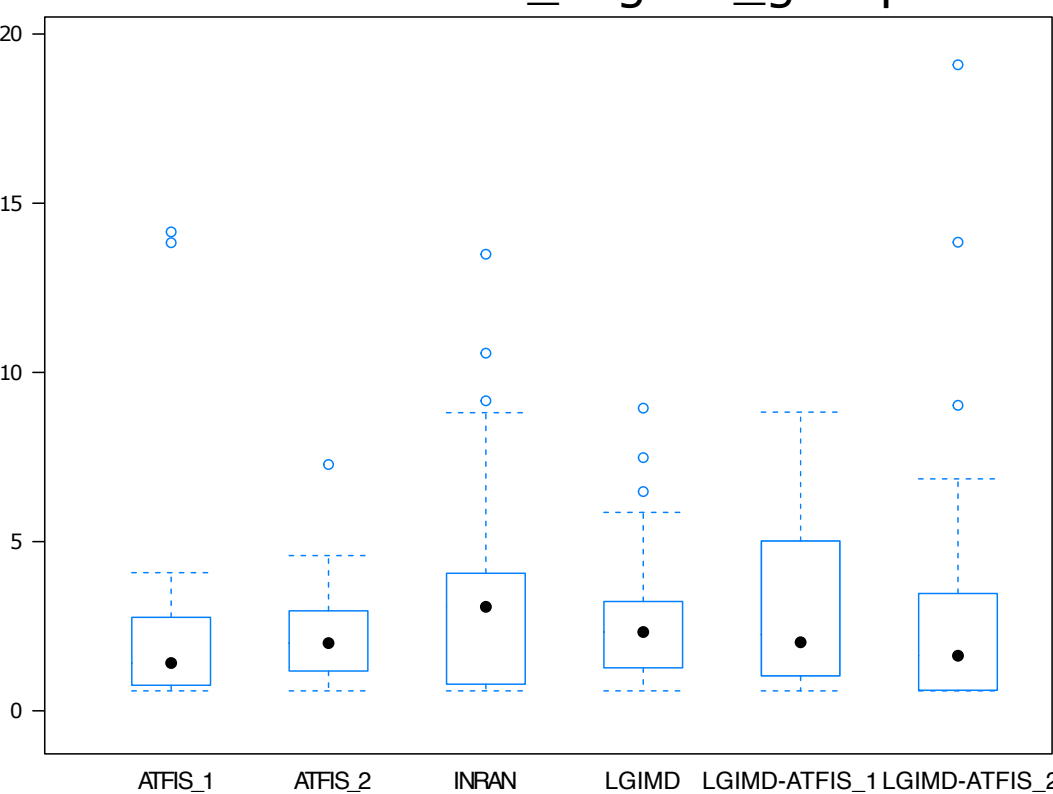

Enterorhabdus

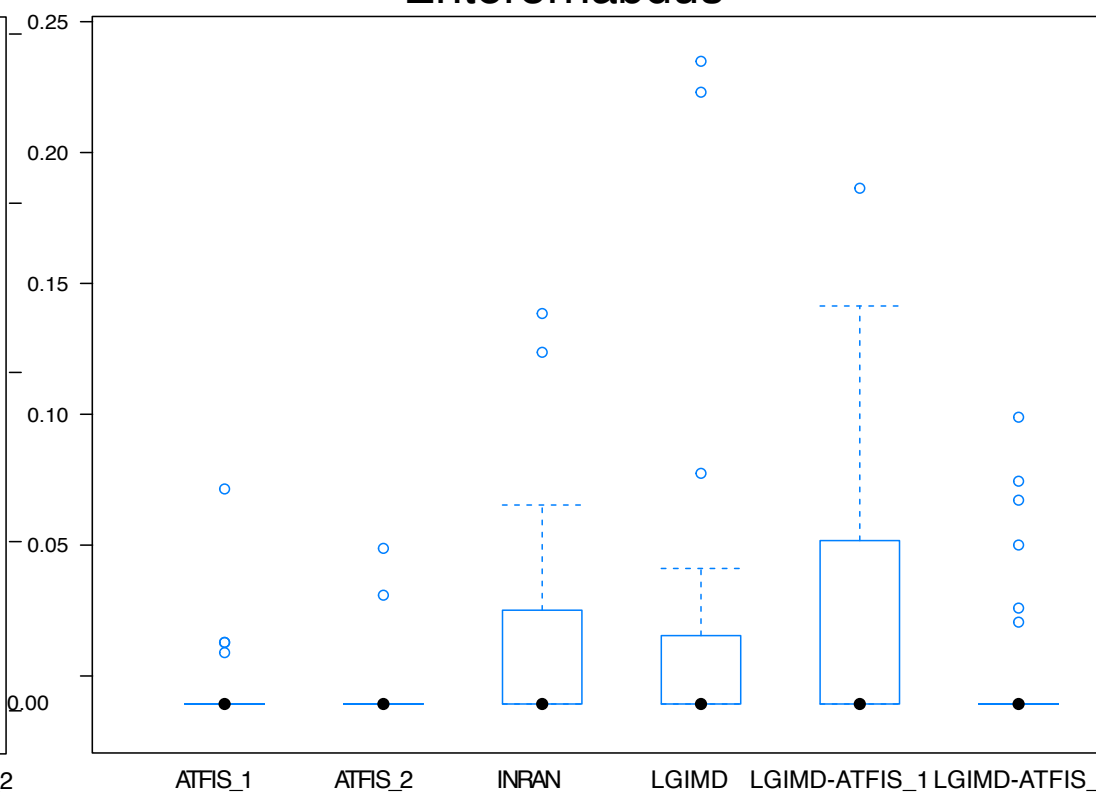

Desulfovibrio

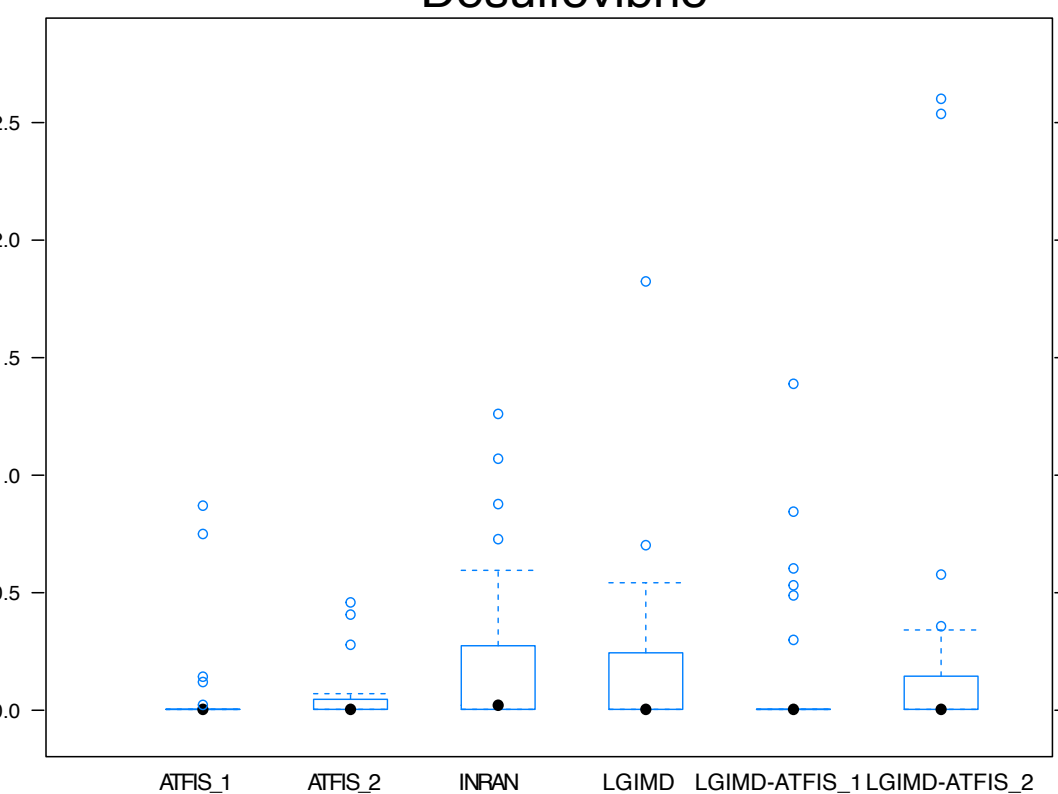

Supplement: s1 [file s1]
