# Supplementary figures and images for: A Low Glycemic Index Mediterranean Diet Combined with Aerobic Physical Activity Rearranges the Gut Microbiota Signature in NAFLD Patients
Source: MDPI journal article supplement (doi:10.3390/nu14091773), 2022-04-23

Value of BIC  
versus number of clusters

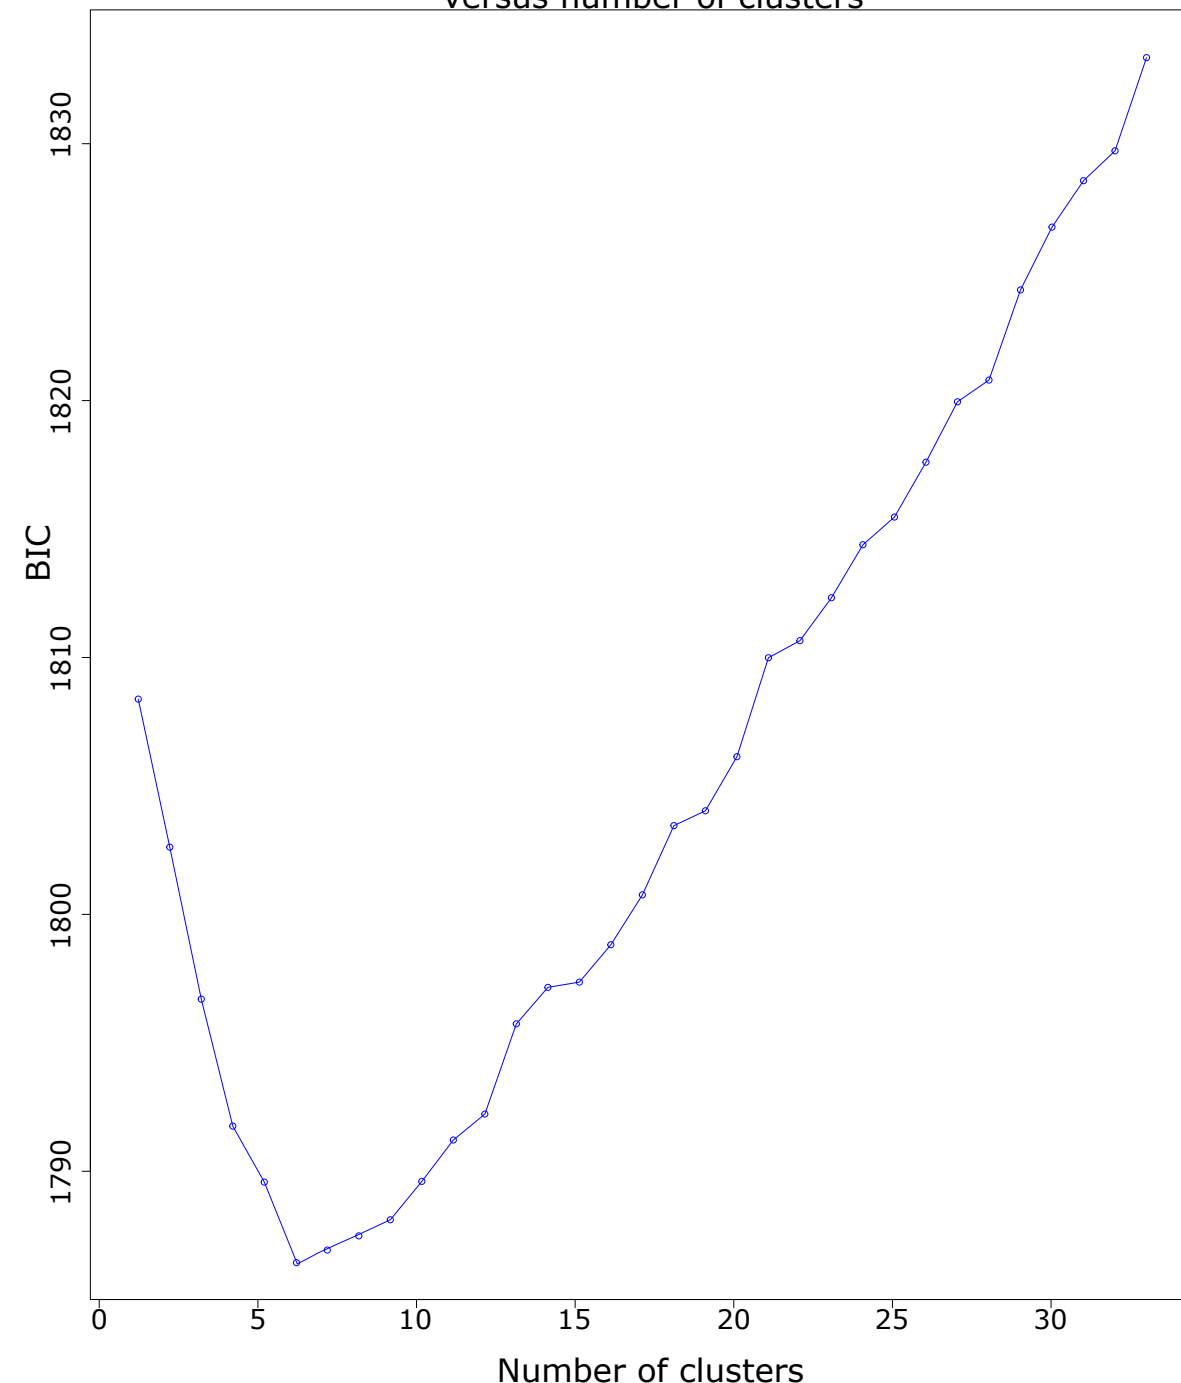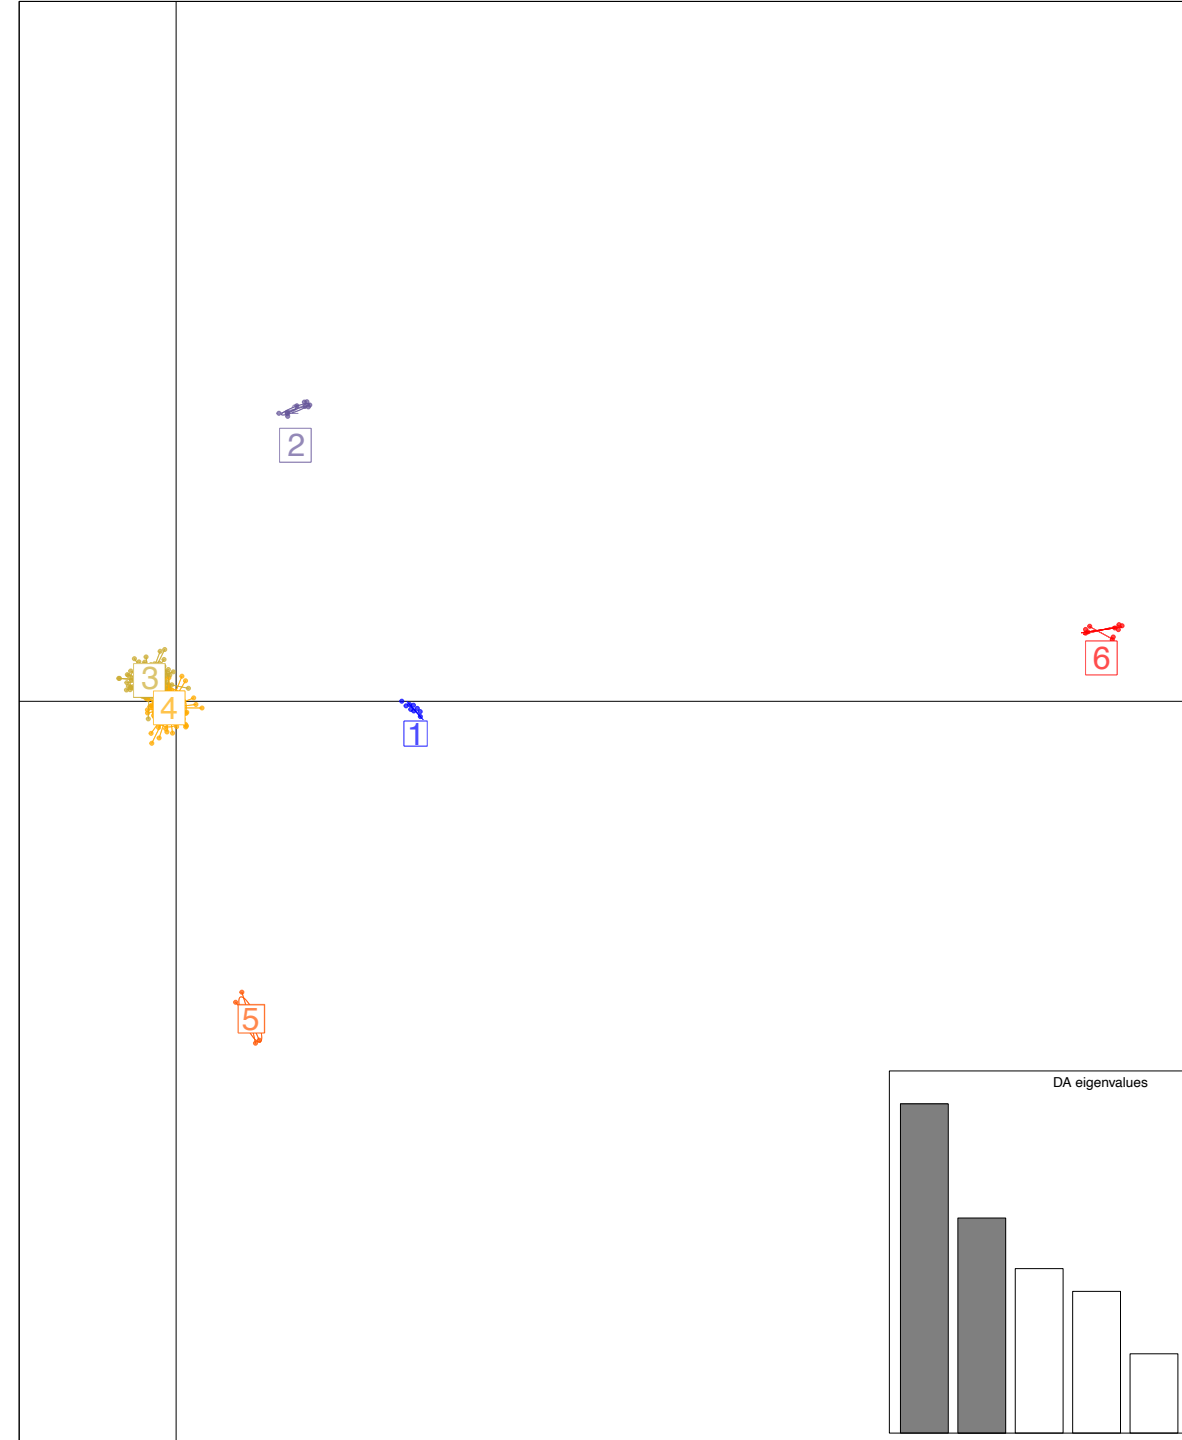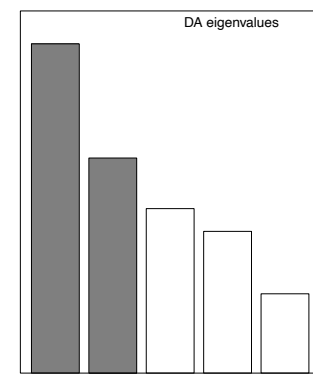

Supplement: s1 [file s1]

PCA – Biplot

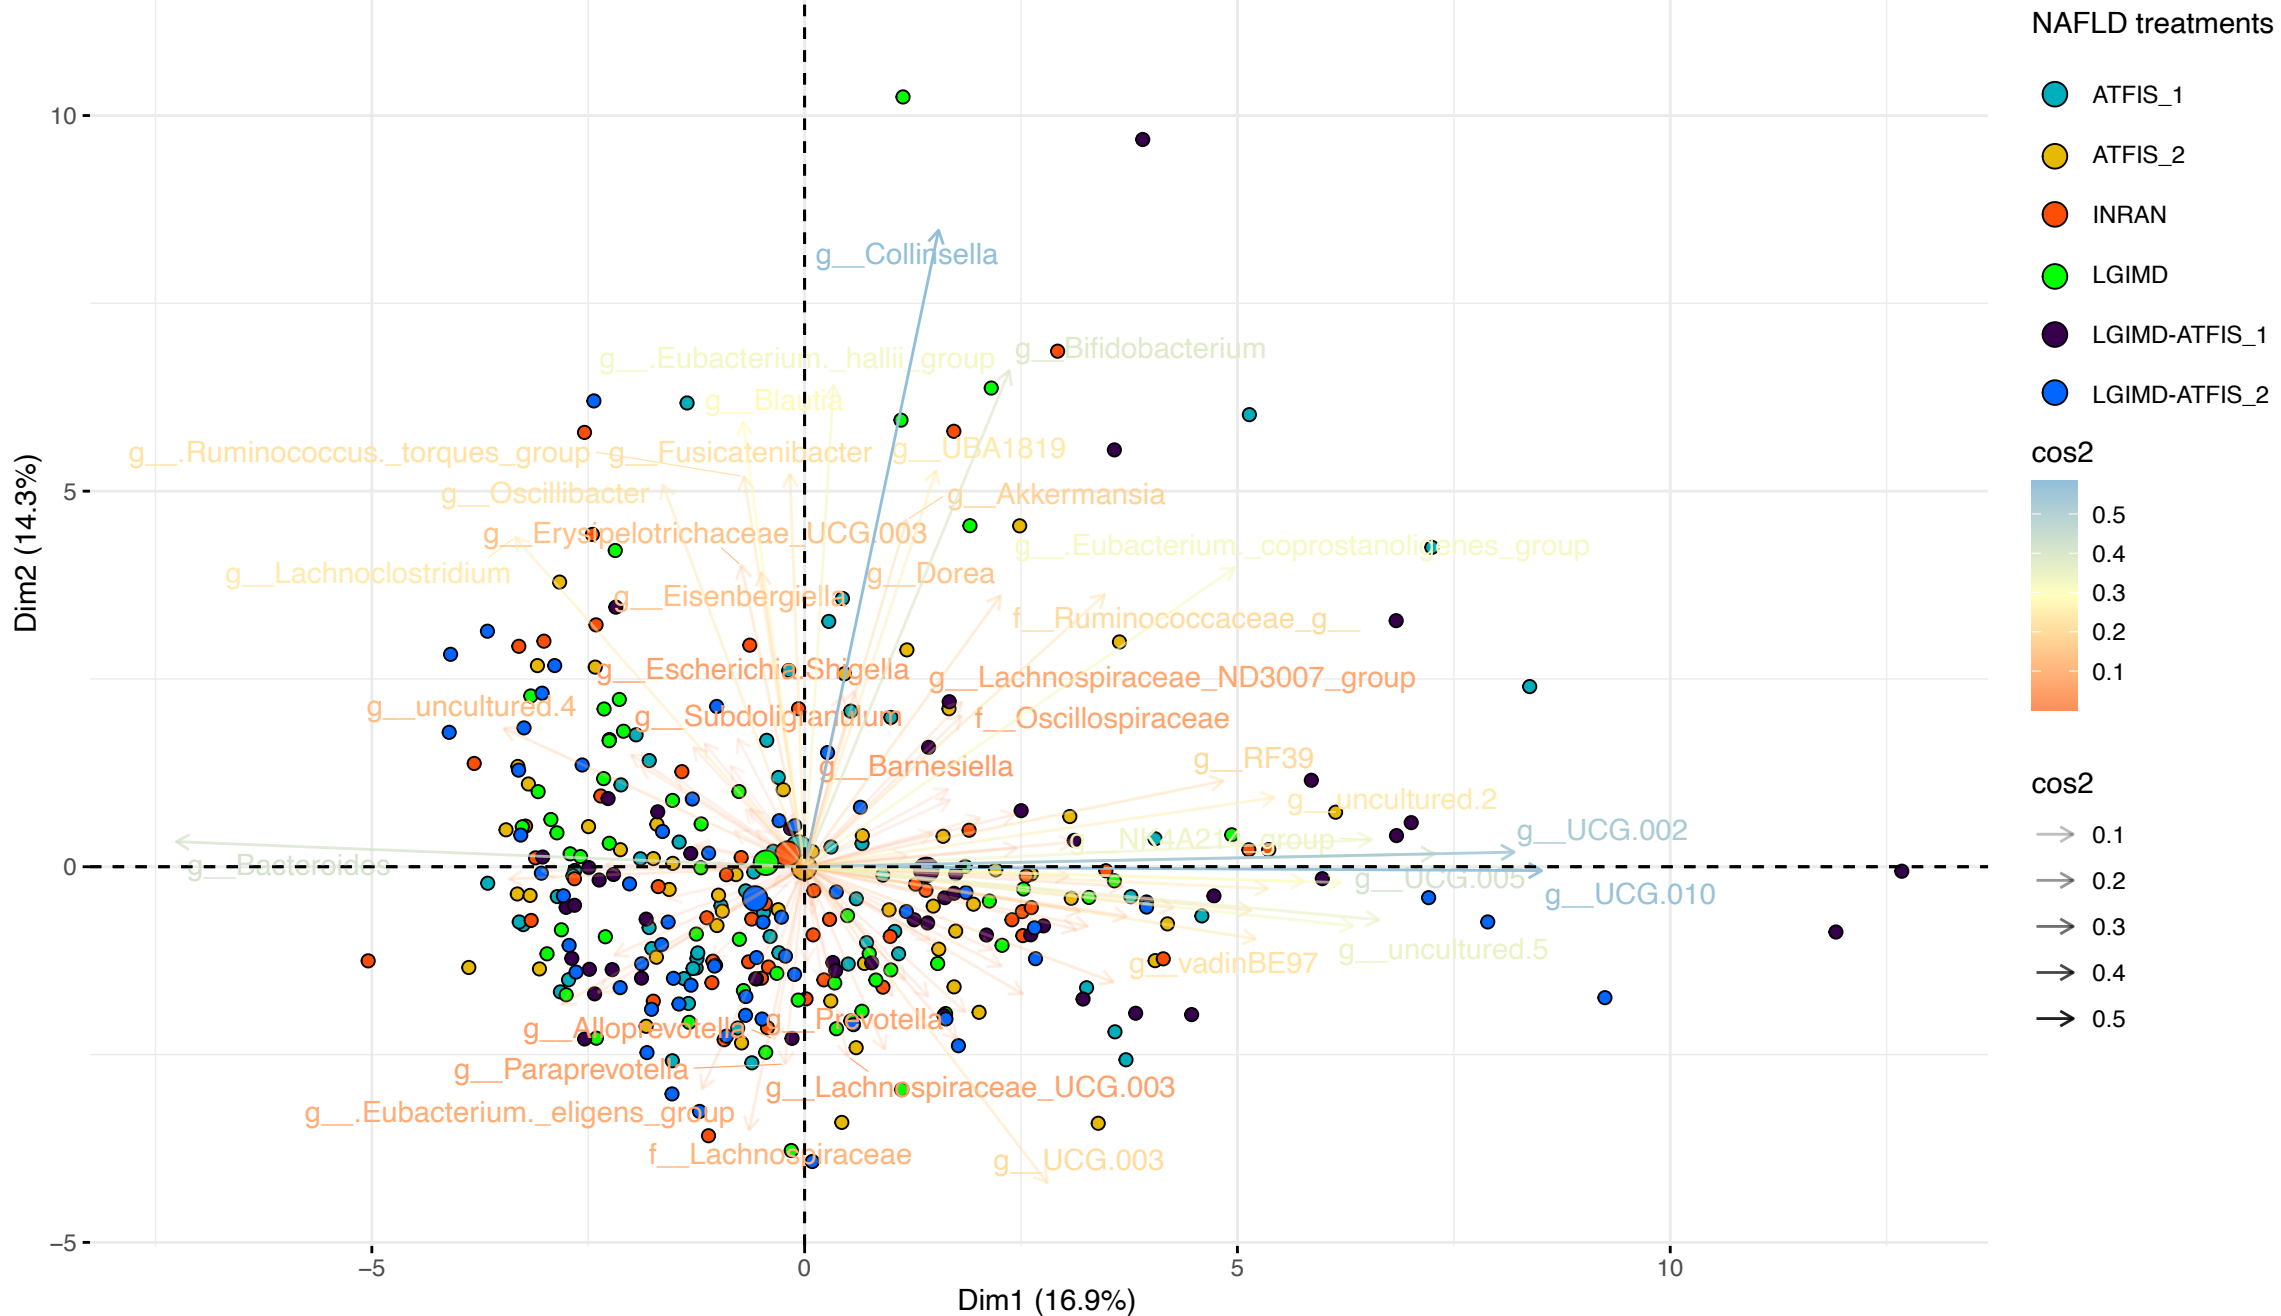

Supplement: s1 [file s1]

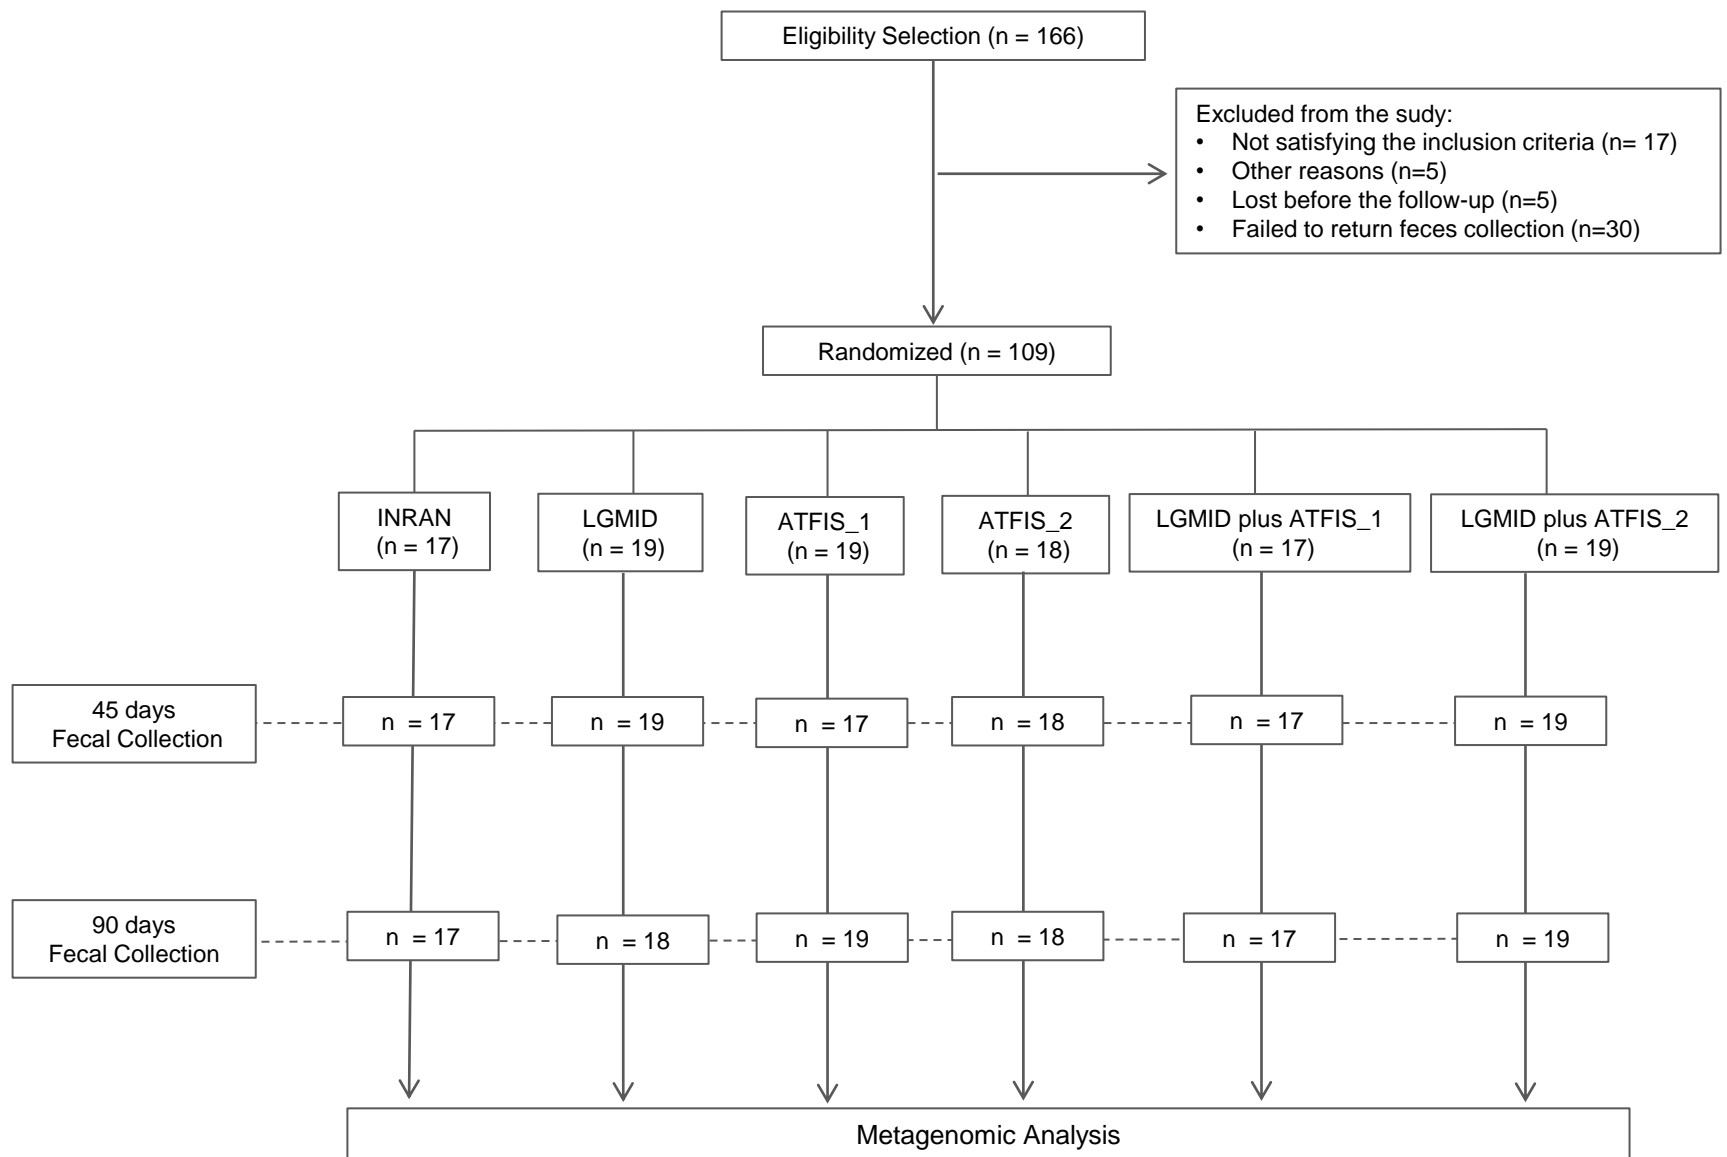

Supplement: s1 [file s1]

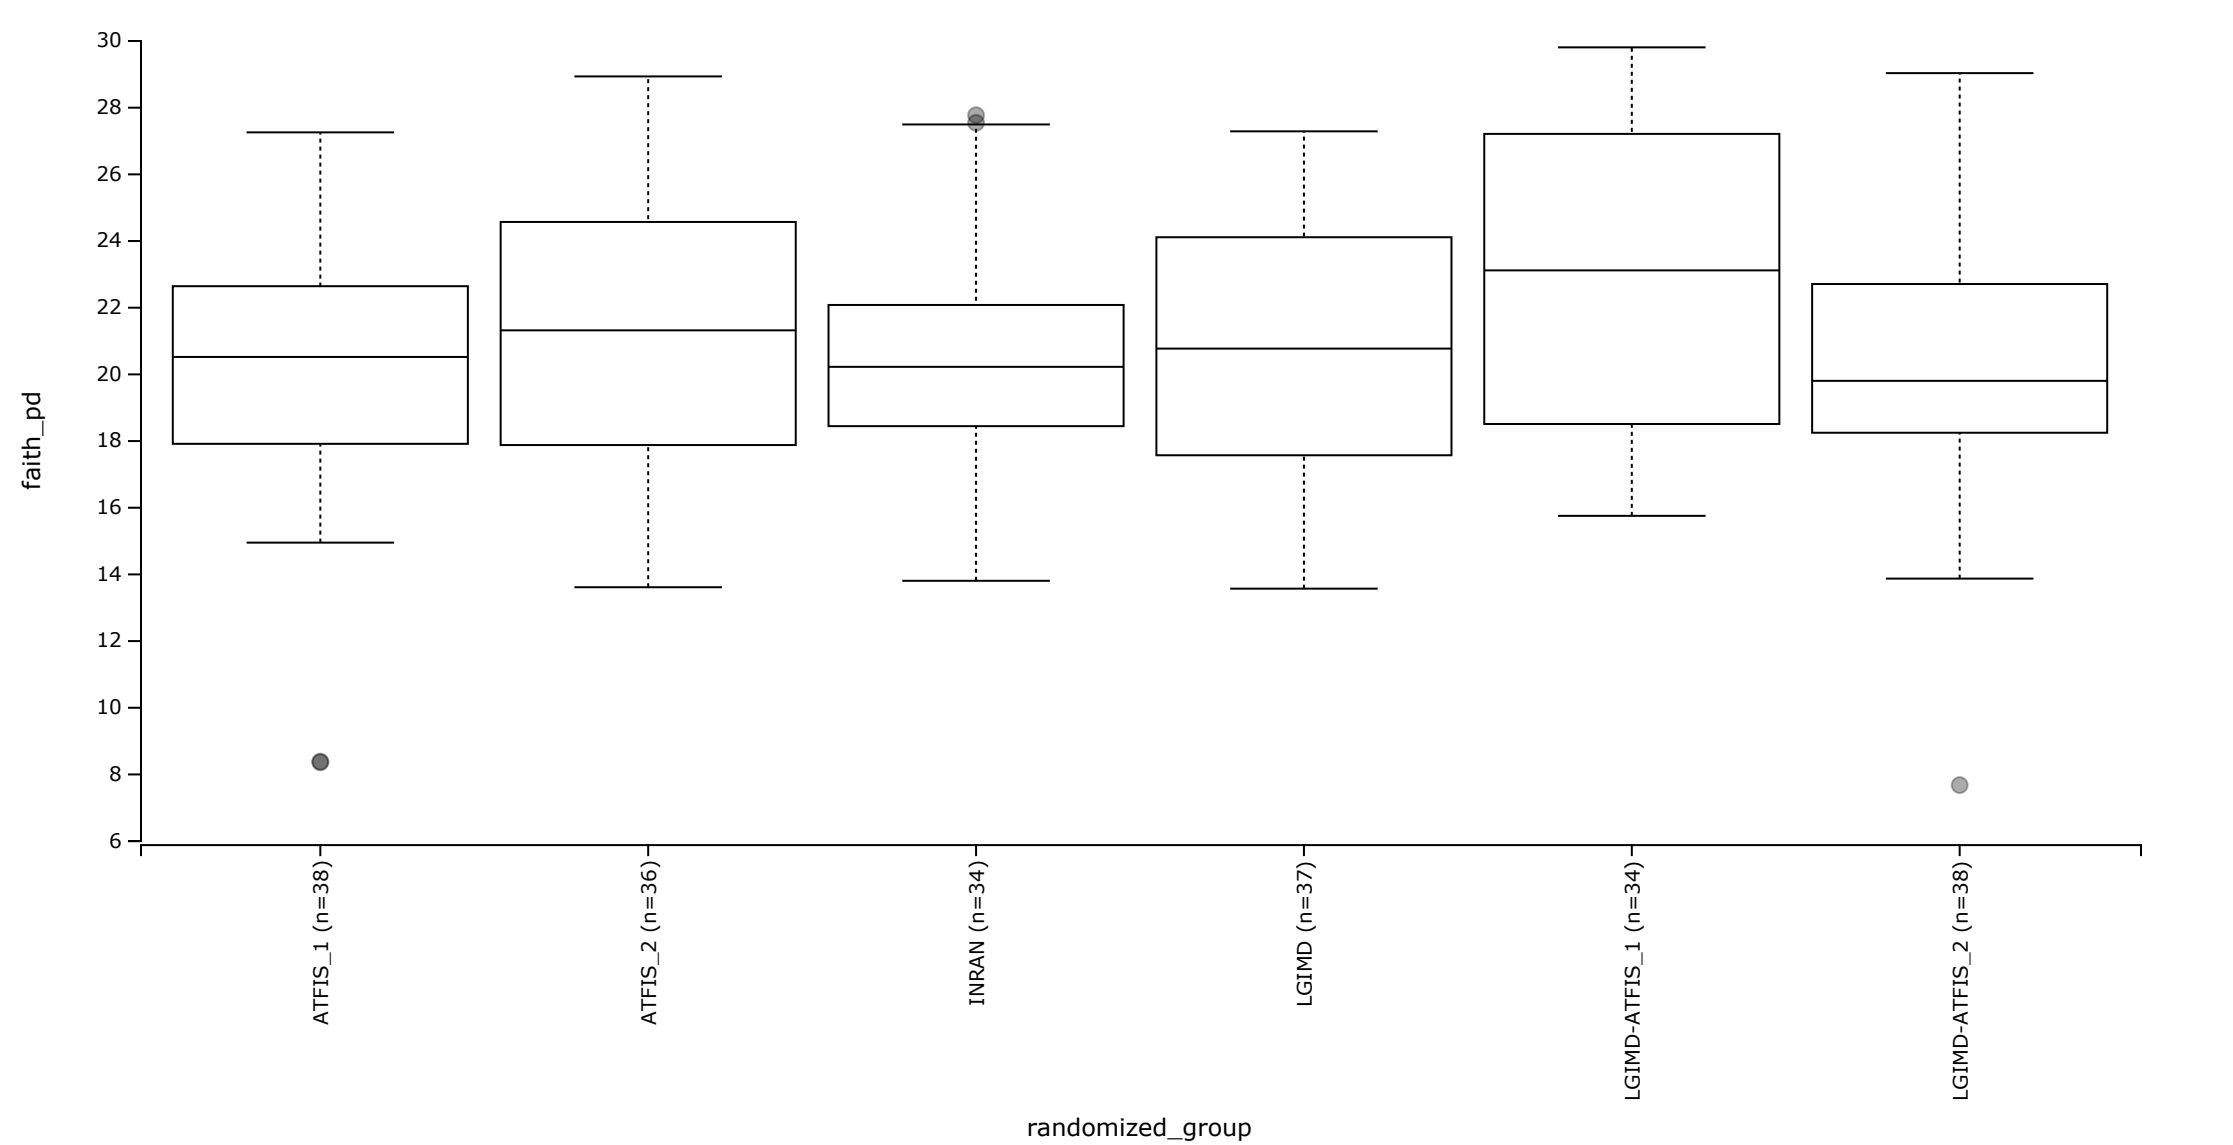

Supplement: s1 [file s1]
